# Supplementary material for: Longitudinal profiles of plasma gelsolin, cytokines and antibody expression predict COVID-19 severity and hospitalization outcomes
Source: bioRxiv or medRxiv preprint supplement (doi:10.1101/2022.06.01.22275882), 2022-06-02
Supplement: Supplementary file [file media-1.pdf]

## Supp. Fig. S1

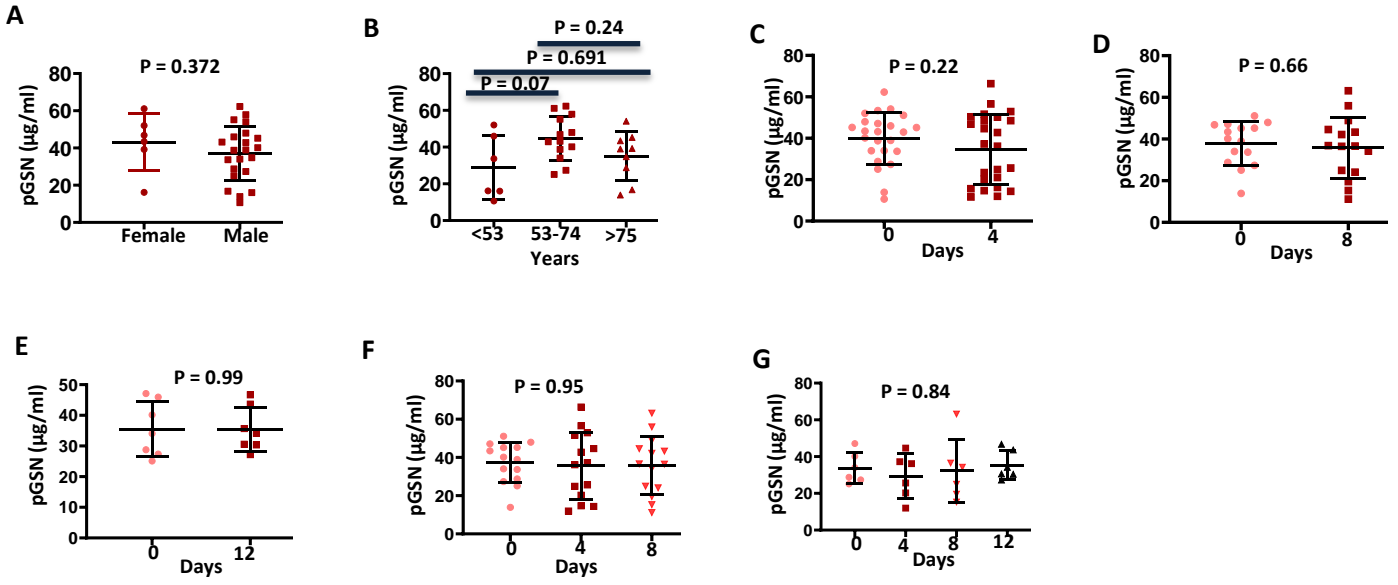

**Supp. Fig. S1. pGSN levels are not affected by gender and age.** The mean $\pm$ SEM levels of pGSN were compared between (A) male and female COVID-19 patients as well as (B) age ranges. (C-G) The mean $\pm$ SEM levels of pGSN were also compared between days of sample collection. *P*-values were calculated using one-way ANOVA and independent sample *t*-test.

## Supp. Fig. S2

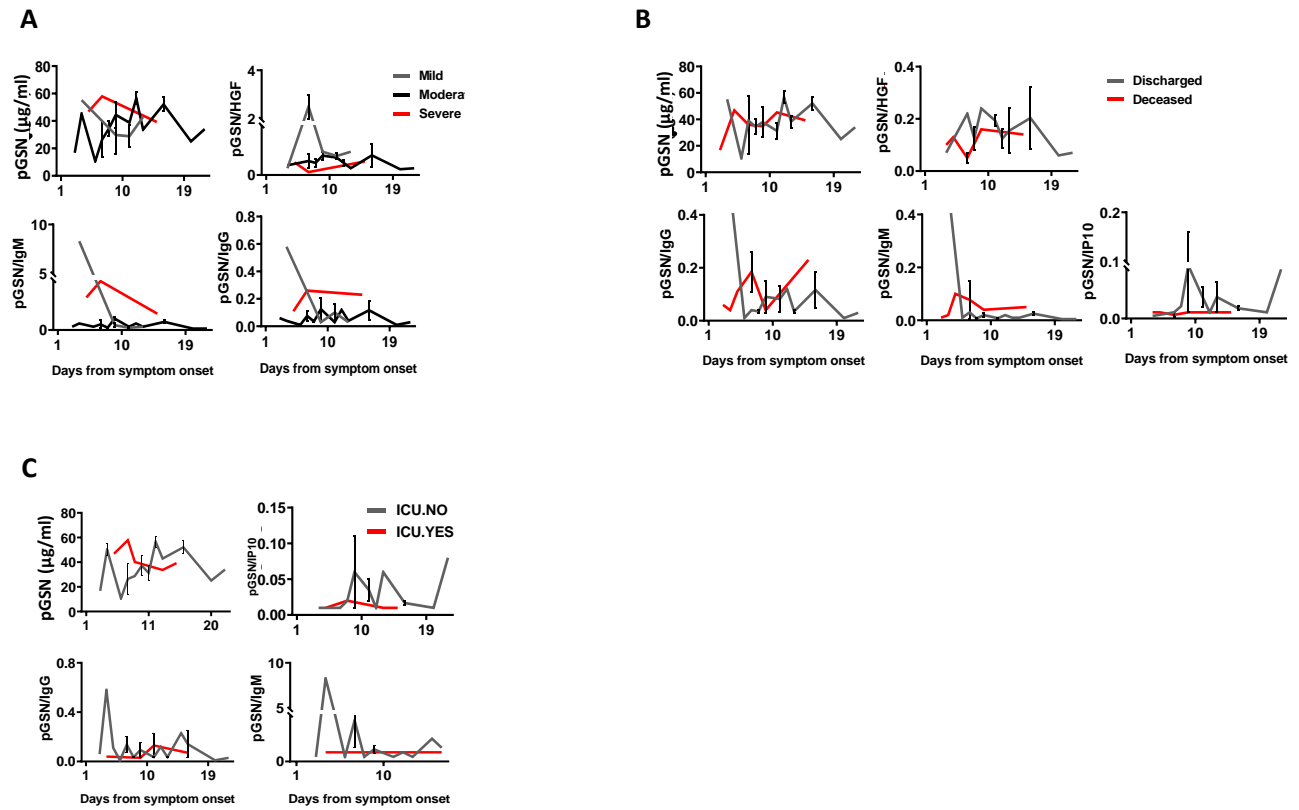

**Supp. Fig. S2. pGSN multi-analyte panels for monitoring disease severity and outcomes days from symptoms onset.** pGSN, pGSN/HGF, pGSN/IP-10, pGSN/IgM and pGSN/IgG were utilized to monitor (A) disease severity, (B) discharge and (C) ICU admittance following day 1 from symptoms onset. *P*-values were calculated by one-way ANOVA and independent sample *t*-test.

### Supp. Fig. S3

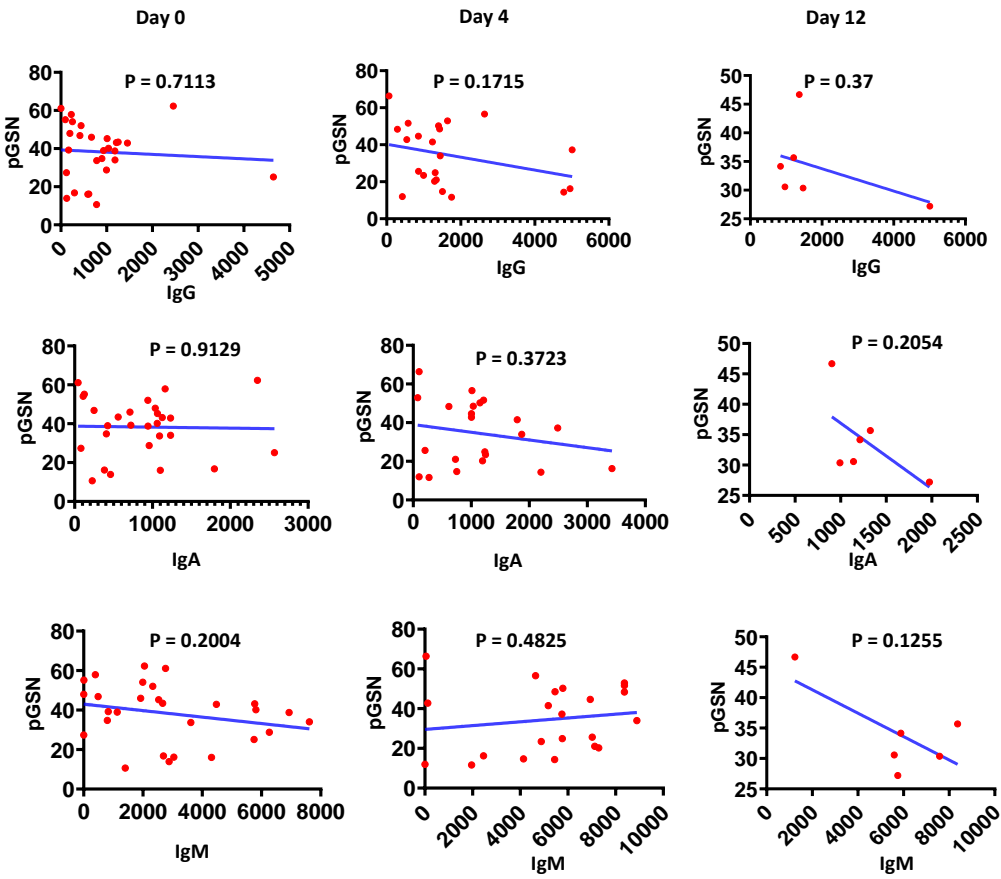

Supp. Fig. S3. Correlation between pGSN and SARS-COV-2 antibodies. pGSN and SARS-COV-2 antibodies (IgG, IgM and IgA) were assessed on day 0, 4 and 12 and correlated using Pearson's test.

# Supp. Fig. S4

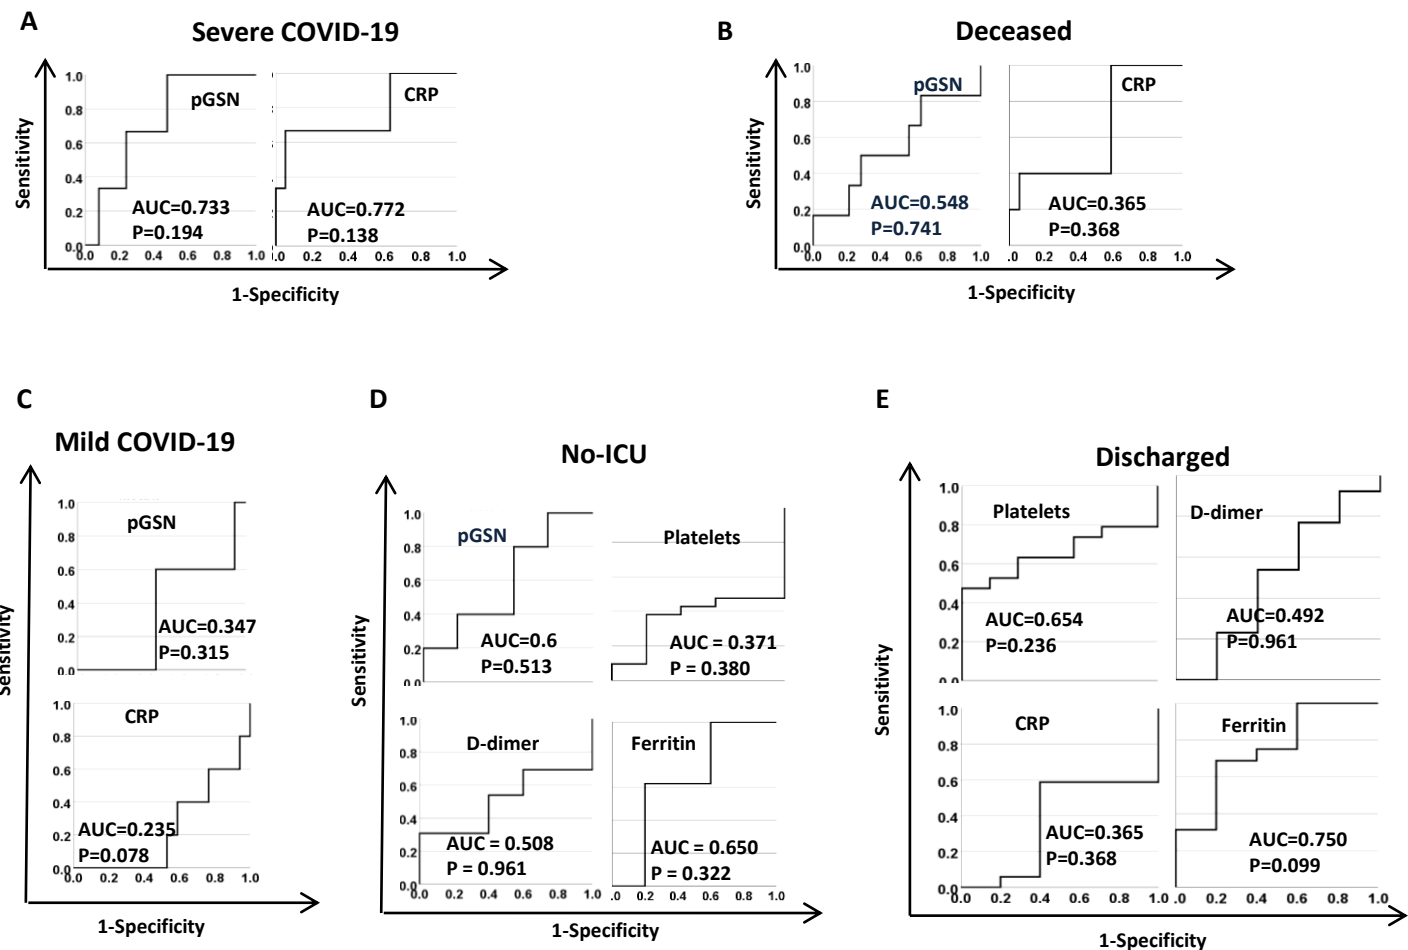

**Supp. Fig. S4. pGSN multi-analyte panels as predictors of COVID-19 outcomes.** ROC curves were used to assess the test performances of pGSN, CRP, platelets, D-dimer and Ferritin in predicting (A) severe COVID-19, (B) deceased patients, (C) mild COVID-19 cases, (D) ICU admissions and (E) patients that are discharged.



**Table 1: Demographics and Baseline Characteristics of COVID-19 Patients**

|                                                  |                         | COVID-19 |       | Non-COVID-19 |       |
|--------------------------------------------------|-------------------------|----------|-------|--------------|-------|
|                                                  |                         | Count    | Mean  | Count        | Mean  |
| Hospitalization outcomes at the end of follow-up | Deceased                | 7        |       | 0            |       |
|                                                  | Discharged              | 21       |       | 0            |       |
| BMI (Kg/m2)                                      |                         |          | 30.51 |              |       |
| ICU Admittance                                   | No                      | 23       |       | 0            |       |
|                                                  | Yes                     | 5        |       | 0            |       |
| Age (yrs)                                        |                         |          | 63.93 |              | 41.67 |
| Gender                                           | Female                  | 6        |       | 7            |       |
|                                                  | Male                    | 22       |       | 5            |       |
| COVID Disease Severity                           | No infection            | 0        |       | 12           |       |
|                                                  | Mild                    | 7        |       | 0            |       |
|                                                  | Moderate                | 18       |       | 0            |       |
|                                                  | Severe                  | 3        |       | 0            |       |
| Days from first positive COVID-19 Test           | 2                       | 2        |       | 0            |       |
|                                                  | 3                       | 7        |       | 0            |       |
|                                                  | 4                       | 4        |       | 0            |       |
|                                                  | 5                       | 1        |       | 0            |       |
|                                                  | 6                       | 1        |       | 0            |       |
|                                                  | 7                       | 4        |       | 0            |       |
|                                                  | 8                       | 1        |       | 0            |       |
|                                                  | 9                       | 2        |       | 0            |       |
|                                                  | 11                      | 1        |       | 0            |       |
|                                                  | 13                      | 1        |       | 0            |       |
|                                                  | 14                      | 1        |       | 0            |       |
|                                                  | 15                      | 1        |       | 0            |       |
|                                                  | 17                      | 1        |       | 0            |       |
|                                                  | 20                      | 1        |       | 0            |       |
|                                                  | 3                       | 1        |       | 0            |       |
|                                                  | Days from symptom onset | 4        | 2     |              | 0     |
| 5                                                |                         | 1        |       | 0            |       |
| 6                                                |                         | 1        |       | 0            |       |
| 7                                                |                         | 3        |       | 0            |       |
| 8                                                |                         | 2        |       | 0            |       |
| 9                                                |                         | 4        |       | 0            |       |
| 11                                               |                         | 4        |       | 0            |       |
| 12                                               |                         | 2        |       | 0            |       |
| 13                                               |                         | 2        |       | 0            |       |
| 15                                               |                         | 1        |       | 0            |       |
| 16                                               |                         | 3        |       | 0            |       |
| 20                                               |                         | 1        |       | 0            |       |
| 22                                               | 1                       |          | 0     |              |       |

Disease severity was defined as follows:

1. Mild (no oxygen/room air received)
2. Moderate [supplemental oxygen, not high flow or no flow listed, no intubation/mechanical ventilation – ex. No Bi-level Positive Airway Pressure (BiPap) /intubation].
3. Severe (high flow oxygen and non-invasive or invasive mechanical ventilation – ex. Yes BiPap/intubation)
